# Supplementary material for: Binding of the atomic cations hydrogen through argon to water and hydrogen sulfide
Source: Royal Society of Chemistry journal article supplement (doi:10.1039/c8cp05378b), 2018-01-01
Supplement: c8cp05378b1.pdf [file c8cp05378b1.pdf]

## Supplementary Information for Binding of the Atomic Cations Hydrogen through Argon to Water and Hydrogen Sulfide

Brent Westbrook\*    Katelyn M. Dreux<sup>†</sup>    Gregory S. Tschumper<sup>‡</sup>  
Joseph S. Francisco<sup>§</sup>    Ryan C. Fortenberry<sup>¶</sup>

September 23, 2018

---

\*St. Edward's University, Department of Chemistry, Austin, TX 78704 U.S.A.

<sup>†</sup>University of Mississippi, Department of Chemistry and Biochemistry, University, MS 38677 U.S.A.

<sup>‡</sup>University of Mississippi, Department of Chemistry and Biochemistry, University, MS 38677 U.S.A.

<sup>§</sup>University of Pennsylvania, Department of Earth and Environmental Science Philadelphia, PA 19104 U.S.A.

<sup>¶</sup>University of Mississippi, Department of Chemistry and Biochemistry, University, MS 38677 U.S.A.  
E-Mail: r410@olemiss.edu

| Complex                         | Term Symbol                 | Atom | X            | Y            | Z            |
|---------------------------------|-----------------------------|------|--------------|--------------|--------------|
| H <sub>2</sub> OH <sup>+</sup>  | <sup>1</sup> A'             | H    | -1.764524250 | -0.452504876 | 0.000000000  |
|                                 |                             | O    | 0.000011932  | 0.085528815  | 0.000000000  |
|                                 |                             | H    | 0.882167425  | -0.452562634 | 1.528173652  |
|                                 |                             | H    | 0.882167425  | -0.452562634 | -1.528173652 |
| H <sub>2</sub> OLi <sup>+</sup> | <sup>1</sup> A <sub>1</sub> | Li   | 0.000000000  | 0.000000000  | -2.606863119 |
|                                 |                             | O    | 0.000000000  | 0.000000000  | 0.880925209  |
|                                 |                             | H    | 0.000000000  | 1.445727505  | 1.984226304  |
|                                 |                             | H    | 0.000000000  | -1.445727505 | 1.984226304  |
| H <sub>2</sub> OBe <sup>+</sup> | <sup>2</sup> A <sub>1</sub> | Be   | 0.000000000  | 0.000000000  | -2.045592745 |
|                                 |                             | O    | 0.000000000  | 0.000000000  | 0.905012644  |
|                                 |                             | H    | 0.000000000  | 1.498922856  | 1.962215377  |
|                                 |                             | H    | 0.000000000  | -1.498922856 | 1.962215377  |
| H <sub>2</sub> OB <sup>+</sup>  | <sup>1</sup> A <sub>1</sub> | B    | 0.000000000  | 0.000000000  | -1.843697338 |
|                                 |                             | O    | 0.000000000  | 0.000000000  | 0.992212616  |
|                                 |                             | H    | 0.000000000  | 1.544275082  | 2.011807100  |
|                                 |                             | H    | 0.000000000  | -1.544275082 | 2.011807100  |
| H <sub>2</sub> OC <sup>+</sup>  | <sup>2</sup> B <sub>2</sub> | C    | 0.000000000  | 0.000000000  | -1.645040084 |
|                                 |                             | O    | 0.000000000  | 0.000000000  | 0.987243811  |
|                                 |                             | H    | 0.000000000  | 1.582491284  | 1.966023680  |
|                                 |                             | H    | 0.000000000  | -1.582491284 | 1.966023680  |
| H <sub>2</sub> ON <sup>+</sup>  | <sup>3</sup> A''            | N    | -0.024521332 | 0.000000000  | -1.585729932 |
|                                 |                             | O    | 0.104609300  | 0.000000000  | 1.153740126  |
|                                 |                             | H    | -0.659872159 | 1.541985354  | 1.861069939  |
|                                 |                             | H    | -0.659872159 | -1.541985354 | 1.861069939  |
| H <sub>2</sub> ON <sup>+</sup>  | <sup>1</sup> A <sub>1</sub> | N    | 0.000000000  | 0.000000000  | -1.445060360 |
|                                 |                             | O    | 0.000000000  | 0.000000000  | 1.016859642  |
|                                 |                             | H    | 0.000000000  | 1.616068918  | 1.970049205  |
|                                 |                             | H    | 0.000000000  | -1.616068918 | 1.970049205  |
| H <sub>2</sub> OO <sup>+</sup>  | <sup>2</sup> A'             | O    | -0.019100363 | 0.000000000  | -1.405253495 |
|                                 |                             | O    | 0.086129907  | 0.000000000  | 1.166020504  |
|                                 |                             | H    | -0.531992223 | 1.598828317  | 1.898716345  |
|                                 |                             | H    | -0.531992223 | -1.598828317 | 1.898716345  |
| H <sub>2</sub> OO <sup>+</sup>  | <sup>2</sup> A''            | O    | -0.020214907 | 0.000000000  | -1.483784647 |
|                                 |                             | O    | 0.128595605  | 0.000000000  | 1.260476109  |
|                                 |                             | H    | -0.860183218 | 1.508048033  | 1.772329022  |
|                                 |                             | H    | -0.860183218 | -1.508048033 | 1.772329022  |
| H <sub>2</sub> OO <sup>+</sup>  | <sup>4</sup> A''            | O    | -0.013700716 | 0.000000000  | -1.996353229 |
|                                 |                             | O    | 0.122592239  | 0.000000000  | 1.720633034  |
|                                 |                             | H    | -0.864237476 | 1.492925122  | 2.188303713  |
|                                 |                             | H    | -0.864237476 | -1.492925122 | 2.188303713  |
| H <sub>2</sub> OF <sup>+</sup>  | <sup>1</sup> A'             | F    | -0.015714364 | 0.000000000  | -1.320817654 |
|                                 |                             | O    | 0.123464419  | 0.000000000  | 1.339887668  |
|                                 |                             | H    | -0.831799914 | 1.542665483  | 1.813613565  |
|                                 |                             | H    | -0.831799914 | -1.542665483 | 1.813613565  |
| H <sub>2</sub> ONe <sup>+</sup> | <sup>2</sup> A'             | Ne   | 0.008158217  | 0.000000000  | -2.317346334 |
|                                 |                             | O    | 0.102429308  | 0.000000000  | 2.646372642  |
|                                 |                             | H    | -0.894612838 | 1.537267206  | 2.193264088  |
|                                 |                             | H    | -0.894612838 | -1.537267206 | 2.193264088  |

|                                 |                             |    |              |              |              |
|---------------------------------|-----------------------------|----|--------------|--------------|--------------|
| H <sub>2</sub> ONa <sup>+</sup> | <sup>1</sup> A <sub>1</sub> | Na | 0.000000000  | 0.000000000  | -1.939000464 |
|                                 |                             | O  | 0.000000000  | 0.000000000  | 2.349844791  |
|                                 |                             | H  | 0.000000000  | 1.436189172  | 3.463140381  |
|                                 |                             | H  | 0.000000000  | -1.436189172 | 3.463140381  |
| H <sub>2</sub> OMg <sup>+</sup> | <sup>2</sup> A <sub>1</sub> | Mg | 0.000000000  | 0.000000000  | -1.699525044 |
|                                 |                             | O  | 0.000000000  | 0.000000000  | 2.170283364  |
|                                 |                             | H  | 0.000000000  | 1.458904554  | 3.265930777  |
|                                 |                             | H  | 0.000000000  | -1.458904554 | 3.265930777  |
| H <sub>2</sub> OAl <sup>+</sup> | <sup>1</sup> A <sub>1</sub> | Al | 0.000000000  | 0.000000000  | -1.593219091 |
|                                 |                             | O  | 0.000000000  | 0.000000000  | 2.264625915  |
|                                 |                             | H  | 0.000000000  | 1.472332434  | 3.350818879  |
|                                 |                             | H  | 0.000000000  | -1.472332434 | 3.350818879  |
| H <sub>2</sub> OAl <sup>+</sup> | <sup>3</sup> B <sub>2</sub> | Al | 0.000000000  | 0.000000000  | -1.461128573 |
|                                 |                             | O  | 0.000000000  | 0.000000000  | 2.070522378  |
|                                 |                             | H  | 0.000000000  | 1.495143594  | 3.123391914  |
|                                 |                             | H  | 0.000000000  | -1.495143594 | 3.123391914  |
| H <sub>2</sub> OSi <sup>+</sup> | <sup>2</sup> B <sub>2</sub> | Si | 0.000000000  | 0.000000000  | -1.427263115 |
|                                 |                             | O  | 0.000000000  | 0.000000000  | 2.107898833  |
|                                 |                             | H  | 0.000000000  | 1.505395678  | 3.155089407  |
|                                 |                             | H  | 0.000000000  | -1.505395678 | 3.155089407  |
| H <sub>2</sub> OSi <sup>+</sup> | <sup>4</sup> A <sub>2</sub> | Si | 0.000000000  | 0.000000000  | -1.367305420 |
|                                 |                             | O  | 0.000000000  | 0.000000000  | 2.017914886  |
|                                 |                             | H  | 0.000000000  | 1.523659182  | 3.033925103  |
|                                 |                             | H  | 0.000000000  | -1.523659182 | 3.033925103  |
| H <sub>2</sub> OP <sup>+</sup>  | <sup>3</sup> A''            | P  | -0.007619735 | 0.000000000  | -1.312153002 |
|                                 |                             | O  | 0.070895962  | 0.000000000  | 2.154084263  |
|                                 |                             | H  | -0.445602424 | 1.509866296  | 3.064793745  |
|                                 |                             | H  | -0.445602424 | -1.509866296 | 3.064793745  |
| H <sub>2</sub> OP <sup>+</sup>  | <sup>1</sup> A <sub>1</sub> | P  | 0.000000000  | 0.000000000  | -1.260246701 |
|                                 |                             | O  | 0.000000000  | 0.000000000  | 2.053808939  |
|                                 |                             | H  | 0.000000000  | 1.537748776  | 3.063112938  |
|                                 |                             | H  | 0.000000000  | -1.537748776 | 3.063112938  |
| H <sub>2</sub> OS <sup>+</sup>  | <sup>2</sup> A'             | S  | -0.006638902 | 0.000000000  | -1.209995801 |
|                                 |                             | O  | 0.062092291  | 0.000000000  | 2.053729406  |
|                                 |                             | H  | -0.387223555 | 1.548669216  | 2.943641048  |
|                                 |                             | H  | -0.387223555 | -1.548669216 | 2.943641048  |
| H <sub>2</sub> OS <sup>+</sup>  | <sup>2</sup> A''            | S  | -0.009420158 | 0.000000000  | -1.252198434 |
|                                 |                             | O  | 0.112005909  | 0.000000000  | 2.151221341  |
|                                 |                             | H  | -0.739139764 | 1.490477788  | 2.841057543  |
|                                 |                             | H  | -0.739139764 | -1.490477788 | 2.841057543  |
| H <sub>2</sub> OS <sup>+</sup>  | <sup>4</sup> A''            | S  | -0.005603490 | 0.000000000  | -1.648454260 |
|                                 |                             | O  | 0.062117359  | 0.000000000  | 2.823185741  |
|                                 |                             | H  | -0.403889409 | 1.461731875  | 3.809832741  |
|                                 |                             | H  | -0.403889409 | -1.461731875 | 3.809832741  |
| H <sub>2</sub> OCl <sup>+</sup> | <sup>1</sup> A'             | Cl | -0.008195732 | 0.000000000  | -1.127239783 |
|                                 |                             | O  | 0.111131595  | 0.000000000  | 2.146776737  |
|                                 |                             | H  | -0.737879009 | 1.519147643  | 2.786322745  |
|                                 |                             | H  | -0.737879009 | -1.519147643 | 2.786322745  |
| H <sub>2</sub> OCl <sup>+</sup> | <sup>3</sup> A'             | Cl | -0.006246835 | 0.000000000  | -1.419486877 |
|                                 |                             | O  | 0.115549369  | 0.000000000  | 2.730267632  |
|                                 |                             | H  | -0.807216475 | 1.491221964  | 3.295049457  |
|                                 |                             | H  | -0.807216475 | -1.491221964 | 3.295049457  |
| H <sub>2</sub> OAr <sup>+</sup> | <sup>2</sup> A'             | Ar | -0.001138085 | 0.000000000  | -1.391867136 |
|                                 |                             | O  | 0.124822818  | 0.000000000  | 3.074753832  |
|                                 |                             | H  | -0.968126073 | 1.515335178  | 3.178806227  |
|                                 |                             | H  | -0.968126073 | -1.515335178 | 3.178806227  |

| Complex                         | Term Symbol                 | Atom | X            | Y            | Z            |
|---------------------------------|-----------------------------|------|--------------|--------------|--------------|
| H <sub>2</sub> SH <sup>+</sup>  | <sup>1</sup> A'             | H    | -2.162843888 | -1.243602880 | 0.000000000  |
|                                 |                             | S    | 0.000005577  | 0.117300571  | 0.000000000  |
|                                 |                             | H    | 1.081333243  | -1.243714513 | 1.873056993  |
|                                 |                             | H    | 1.081333243  | -1.243714513 | -1.873056993 |
| H <sub>2</sub> SLi <sup>+</sup> | <sup>1</sup> A'             | Li   | -0.050911154 | 0.000000000  | -3.843310826 |
|                                 |                             | S    | 0.108631599  | 0.000000000  | 0.752154242  |
|                                 |                             | H    | -1.552351698 | 1.846334943  | 1.271085298  |
|                                 |                             | H    | -1.552351698 | -1.846334943 | 1.271085298  |
| H <sub>2</sub> SBe <sup>+</sup> | <sup>2</sup> A'             | Be   | -0.027635995 | 0.000000000  | -3.185068348 |
|                                 |                             | S    | 0.108638495  | 0.000000000  | 0.824101016  |
|                                 |                             | H    | -1.604207381 | 1.866174652  | 1.132870361  |
|                                 |                             | H    | -1.604207381 | -1.866174652 | 1.132870361  |
| H <sub>2</sub> SB <sup>+</sup>  | <sup>1</sup> A'             | B    | -0.013236403 | 0.000000000  | -3.120356572 |
|                                 |                             | S    | 0.106762010  | 0.000000000  | 0.979299676  |
|                                 |                             | H    | -1.626934397 | 1.866288894  | 1.158157690  |
|                                 |                             | H    | -1.626934397 | -1.866288894 | 1.158157690  |
| H <sub>2</sub> SC <sup>+</sup>  | <sup>2</sup> A''            | C    | -0.044522264 | 0.000000000  | -2.546920756 |
|                                 |                             | S    | 0.106703326  | 0.000000000  | 0.860385793  |
|                                 |                             | H    | -1.431708094 | 1.947048250  | 1.491704203  |
|                                 |                             | H    | -1.431708094 | -1.947048250 | 1.491704203  |
| H <sub>2</sub> SN <sup>+</sup>  | <sup>3</sup> A''            | N    | -0.028677342 | 0.000000000  | -2.327664910 |
|                                 |                             | S    | 0.111654981  | 0.000000000  | 0.932397419  |
|                                 |                             | H    | -1.576474666 | 1.891531121  | 1.344446509  |
|                                 |                             | H    | -1.576474666 | -1.891531121 | 1.344446509  |
|                                 | <sup>1</sup> A <sub>1</sub> | N    | 0.000000000  | 0.000000000  | -2.038802018 |
|                                 |                             | S    | 0.000000000  | 0.000000000  | 0.747200061  |
|                                 |                             | H    | 0.000000000  | 2.082616699  | 2.282702479  |
|                                 |                             | H    | 0.000000000  | -2.082616699 | 2.282702479  |
| H <sub>2</sub> SO <sup>+</sup>  | <sup>2</sup> A'             | O    | -0.051210411 | 0.000000000  | -1.940063511 |
|                                 |                             | S    | 0.100511511  | 0.000000000  | 0.854535739  |
|                                 |                             | H    | -1.192066588 | 2.009760883  | 1.807367682  |
|                                 |                             | H    | -1.192066588 | -2.009760883 | 1.807367682  |
|                                 | <sup>2</sup> A''            | O    | -0.026251734 | 0.000000000  | -2.097933767 |
|                                 |                             | S    | 0.118374629  | 0.000000000  | 0.962496710  |
|                                 |                             | H    | -1.674245799 | 1.823161102  | 1.343352283  |
|                                 |                             | H    | -1.674245799 | -1.823161102 | 1.343352283  |
|                                 | <sup>4</sup> A <sub>2</sub> | O    | -0.000120106 | 0.000000000  | -1.982682717 |
|                                 |                             | S    | -0.000538665 | 0.000000000  | 0.948276331  |
|                                 |                             | H    | 0.009520024  | 2.815316336  | 0.654798256  |
|                                 |                             | H    | 0.009520024  | -2.815316336 | 0.654798256  |
| H <sub>2</sub> SF <sup>+</sup>  | <sup>1</sup> A'             | F    | -0.028006568 | 0.000000000  | -1.887015610 |
|                                 |                             | S    | 0.115665466  | 0.000000000  | 1.023230295  |
|                                 |                             | H    | -1.575567381 | 1.865288975  | 1.510764418  |
|                                 |                             | H    | -1.575567381 | -1.865288975 | 1.510764418  |
|                                 | <sup>3</sup> B <sub>1</sub> | F    | 0.000000000  | 0.000000000  | -1.870867229 |
|                                 |                             | S    | 0.000000000  | 0.000000000  | 1.051836202  |
|                                 |                             | H    | 0.000000000  | 2.723328334  | 0.903635599  |
|                                 |                             | H    | 0.000000000  | -2.723328334 | 0.903635599  |
| H <sub>2</sub> SNe <sup>+</sup> | <sup>2</sup> A'             | Ne   | 0.020883105  | 0.000000000  | -3.664218375 |
|                                 |                             | S    | 0.079743436  | 0.000000000  | 2.219121989  |
|                                 |                             | H    | -1.477257933 | 1.860524545  | 1.386596240  |
|                                 |                             | H    | -1.477257933 | -1.860524545 | 1.386596240  |

|                                 |                             |    |              |               |              |
|---------------------------------|-----------------------------|----|--------------|---------------|--------------|
| H <sub>2</sub> SNa <sup>+</sup> | <sup>1</sup> A'             | Na | -0.014367061 | 0.000000000   | -3.227816099 |
|                                 |                             | S  | 0.107027704  | 0.000000000   | 2.143853880  |
|                                 |                             | H  | -1.538291579 | 1.840732429   | 2.716004773  |
|                                 |                             | H  | -1.538291579 | -1.840732429  | 2.716004773  |
| H <sub>2</sub> SMg <sup>+</sup> | <sup>2</sup> A'             | Mg | -0.010370293 | 0.000000000   | -2.956563969 |
|                                 |                             | S  | 0.107795740  | 0.000000000   | 2.085337014  |
|                                 |                             | H  | -1.589321505 | 1.849552819   | 2.481984355  |
|                                 |                             | H  | -1.589321505 | -1.849552819  | 2.481984355  |
| H <sub>2</sub> SAI <sup>+</sup> | <sup>1</sup> A'             | Al | -0.008297755 | 0.000000000   | -2.925397194 |
|                                 |                             | S  | 0.107438102  | 0.000000000   | 2.294883016  |
|                                 |                             | H  | -1.597604690 | 1.849131342   | 2.657783154  |
|                                 |                             | H  | -1.597604690 | -1.849131342  | 2.657783154  |
|                                 | <sup>3</sup> A''            | Al | -0.01858625  | 7 0.000000000 | -2.452200490 |
|                                 |                             | S  | 0.106177573  | 0.000000000   | 1.897215487  |
|                                 |                             | H  | -1.439851150 | 1.883070187   | 2.648678045  |
|                                 |                             | H  | -1.439851150 | -1.883070187  | 2.648678045  |
| H <sub>2</sub> SSi <sup>+</sup> | <sup>2</sup> A''            | Si | -0.014692200 | 0.000000000   | -2.452986662 |
|                                 |                             | S  | 0.106377864  | 0.000000000   | 1.985620013  |
|                                 |                             | H  | -1.487110616 | 1.889797249   | 2.596572855  |
|                                 |                             | H  | -1.487110616 | -1.889797249  | 2.596572855  |
| H <sub>2</sub> SP <sup>+</sup>  | <sup>3</sup> A''            | P  | -0.010858010 | 0.000000000   | -2.207656741 |
|                                 |                             | S  | 0.109497396  | 0.000000000   | 1.980430208  |
|                                 |                             | H  | -1.574584361 | 1.868387825   | 2.424170872  |
|                                 |                             | H  | -1.574584361 | -1.868387825  | 2.424170872  |
|                                 | <sup>1</sup> A <sub>1</sub> | P  | 0.000000000  | 0.000000000   | -1.955210786 |
|                                 |                             | S  | 0.000000000  | 0.000000000   | 1.683158025  |
|                                 |                             | H  | 0.000000000  | 2.010028037   | 3.273103232  |
|                                 |                             | H  | 0.000000000  | -2.010028037  | 3.273103232  |
| H <sub>2</sub> SS <sup>+</sup>  | <sup>2</sup> A'             | S  | -0.016467160 | 0.000000000   | -1.976341240 |
|                                 |                             | S  | 0.107317315  | 0.000000000   | 1.818729724  |
|                                 |                             | H  | -1.444855832 | 1.911857696   | 2.506610121  |
|                                 |                             | H  | -1.444855832 | -1.911857696  | 2.506610121  |
|                                 | <sup>2</sup> A''            | S  | -0.010255664 | 0.000000000   | -2.050523678 |
|                                 |                             | S  | 0.112727568  | 0.000000000   | 1.905793293  |
|                                 |                             | H  | -1.629684917 | 1.839191458   | 2.301752165  |
|                                 |                             | H  | -1.629684917 | -1.839191458  | 2.301752165  |
|                                 | <sup>4</sup> A''            | S  | -0.001398414 | 0.000000000   | -2.681242435 |
|                                 |                             | S  | 0.104853753  | 0.000000000   | 2.518466042  |
|                                 |                             | H  | -1.645325211 | 1.847442514   | 2.588750893  |
|                                 |                             | H  | -1.645325211 | -1.847442514  | 2.588750893  |
| H <sub>2</sub> SCL <sup>+</sup> | <sup>1</sup> A'             | Cl | -0.011729691 | 0.000000000   | -1.845157562 |
|                                 |                             | S  | 0.111902285  | 0.000000000   | 1.890749339  |
|                                 |                             | H  | -1.573374673 | 1.864091411   | 2.380571885  |
|                                 |                             | H  | -1.573374673 | -1.864091411  | 2.380571885  |
|                                 | <sup>3</sup> A'             | Cl | 0.001239572  | 0.000000000   | -2.512589478 |
|                                 |                             | S  | 0.102020971  | 0.000000000   | 2.618155745  |
|                                 |                             | H  | -1.644313593 | 1.860569277   | 2.550132737  |
|                                 |                             | H  | -1.644313593 | -1.860569277  | 2.550132737  |
|                                 | <sup>3</sup> B <sub>1</sub> | Cl | 0.000000000  | 0.000000000   | -3.295126488 |
|                                 |                             | S  | 0.000000000  | 0.000000000   | 3.323962406  |
|                                 |                             | H  | 0.000000000  | 1.863975227   | 5.087547203  |
|                                 |                             | H  | 0.000000000  | -1.863975227  | 5.087547203  |
| H <sub>2</sub> SAr <sup>+</sup> | <sup>2</sup> A'             | Ar | 0.004970907  | 0.000000000   | -2.623490712 |
|                                 |                             | S  | 0.096459682  | 0.000000000   | 3.095999149  |
|                                 |                             | H  | -1.632574951 | 1.858530359   | 2.750895014  |
|                                 |                             | H  | -1.632574951 | -1.858530359  | 2.750895014  |
